# Supplementary material for: Long-Term Epigenetic Regulation of Foxo3 Expression in Neonatal Valproate-Exposed Rat Hippocampus with Sex-Related Differences
Source: MDPI journal article supplement (doi:10.3390/ijms25105287), 2024-05-13
Supplement: s1 [file s1]

## Supplementary data

### Figure S1. Sociability test.

(A), (C) After 4 and 8 weeks of neonatal VPA exposure, the social index was measured by comparing the time spent in the empty zone and the stranger zone through a social interaction test.

(B), (D) The social preference index was measured by comparing the time spent in the stranger zone and the familiar zone. Values represent the mean  $\pm$  Standard deviation.

The significance level between the groups is indicated by \*  $p < 0.05$ , \*\*  $p < 0.01$  and \*\*\*  $p < 0.001$ .

((A), male control  $n = 21$ , male VPA  $n = 22$ , female control  $n = 20$ , female VPA  $n = 15$ ;

(B), male control  $n = 5$ , male VPA  $n = 6$ , female control  $n = 4$ , female VPA  $n = 6$ ;

(C), male control  $n = 19$ , male VPA  $n = 20$ , female control  $n = 16$ , female VPA  $n = 15$ ;

(D), male control  $n = 4$ , male VPA  $n = 6$ , female control  $n = 5$ , female VPA  $n = 6$ )).

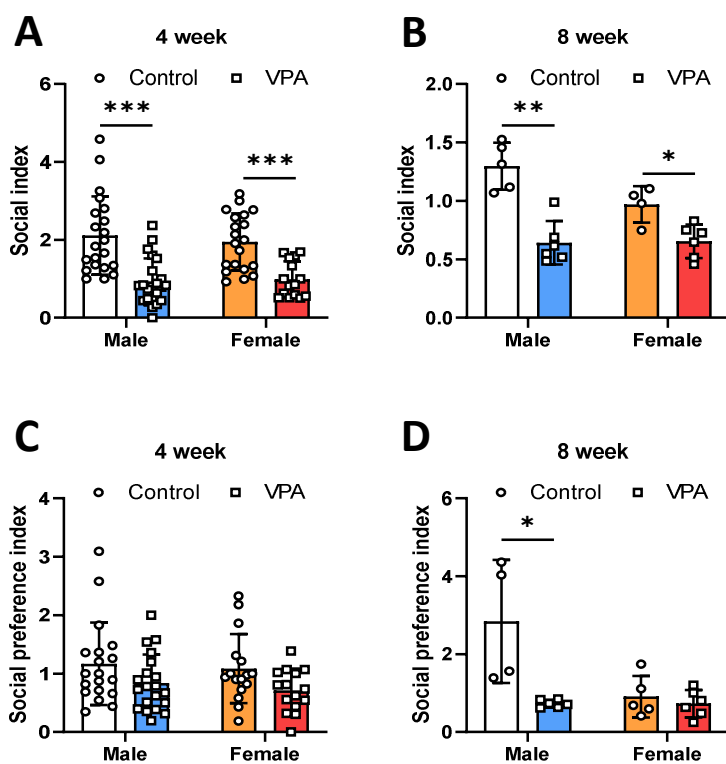

**Figure S2. Neonatal VPA exposure have long-term effects on FOXO3 and Notch signaling protein expression in the 4 and 8 weeks old male hippocampus.**

The protein levels of *Foxo3* (Fig. 3A;  $t(21) = -2.090$ ,  $p = 0.048$ ) and *Notch1* (Fig. 3C;  $t(21) = -2.882$ ,  $p = 0.009$ ,  $p = 0.009$ ) were significantly increased only in the 4 weeks old male rats after VPA exposure.

*Ascl1* protein levels were significantly decreased in 4 weeks old males (Fig. 3B;  $t(21) = 2.260$ ,  $p = 0.026$ ) and 8 weeks old males (Fig. 3B;  $t(14) = 2.334$ ,  $p = 0.035$ ).

No changes were observed in the females, and no sex-related differences were observed.

The significance level between the groups is indicated by \*  $p < 0.05$ , \*\*  $p < 0.01$  and \*\*\*  $p < 0.001$ .

((A) 4 weeks control  $n = 12$ , 4 weeks VPA  $n = 11$ , 8 weeks control  $n = 8$ , 8 weeks VPA  $n = 8$ ;

(B) 4 weeks control  $n = 12$ , 4 weeks VPA  $n = 11$ , 8 weeks control  $n = 12$ , 8 weeks VPA  $n = 12$ ;

(C) 4 weeks control  $n = 12$ , 4 weeks VPA  $n = 11$ , 8 weeks control  $n = 8$ , 8 weeks VPA  $n = 8$ ).

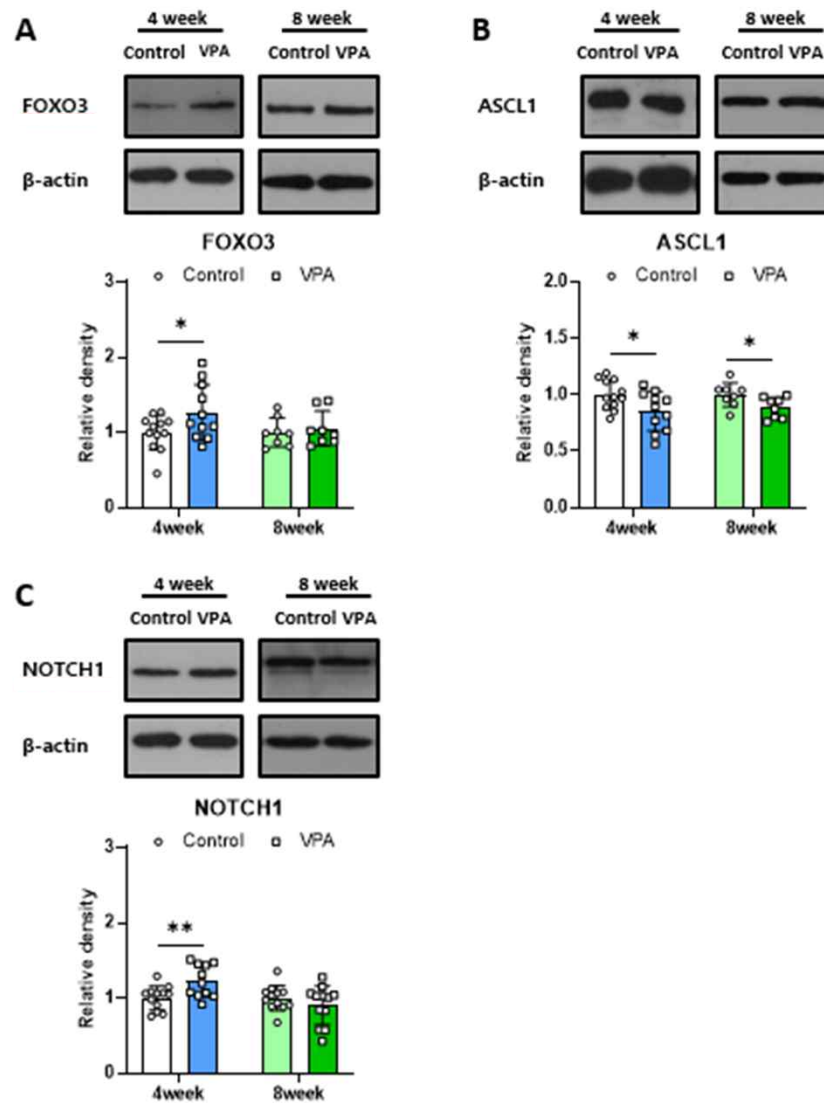

**Table S1. Two-way ANOVA results Summary for VPA exposure and sex differences**

| Figure | Test                                       | Gene          | Sex    |         | Treatment |         | Sex & Treatment |         |
|--------|--------------------------------------------|---------------|--------|---------|-----------|---------|-----------------|---------|
|        |                                            |               | F      | p-value | F         | p-value | F               | p-value |
| 1      | qPCR                                       | <i>Ngn2</i>   | 5.355  | 0.026   | 0.074     | 0.787   | 4.694           | 0.037   |
|        |                                            | <i>Notch1</i> | 64.787 | 0.000   | 13.525    | 0.001   | 3.249           | 0.081   |
|        |                                            | <i>Reln</i>   | 1.260  | 0.269   | 3.225     | 0.080   | 5.966           | 0.019   |
|        |                                            | <i>Lphn2</i>  | 0.874  | 0.356   | 3.636     | 0.064   | 1.441           | 0.237   |
| 3      | Western blot                               | LC3-2/1       | 7.368  | 0.010   | 3.952     | 0.054   | 5.831           | 0.021   |
|        |                                            | P62           | 0.007  | 0.933   | 0.433     | 0.515   | 15.910          | 0.001   |
| 4      | ChIP-qPCR                                  | <i>Foxo3</i>  | 0.714  | 0.404   | 8.078     | 0.008   | 0.453           | 0.506   |
|        |                                            | <i>Ascl1</i>  | 5.563  | 0.024   | 0.007     | 0.936   | 2.298           | 0.139   |
| 5      | DNA methylation & hydroxymethylation assay | 5-mc          | 13.811 | 0.001   | 0.029     | 0.866   | 16.402          | 0.000   |
|        |                                            | 5-hmc         | 4.670  | 0.037   | 0.711     | 0.405   | 0.080           | 0.778   |
|        | MERE-based qPCR                            | <i>Foxo3</i>  | 0.138  | 0.713   | 7.035     | 0.012   | 0.471           | 0.497   |
|        |                                            | <i>Ascl1</i>  | 5.004  | 0.031   | 2.472     | 0.124   | 1.613           | 0.212   |

**Table S2. Primer list**

| <b>Primers for RT-qPCR</b>         |                           |                             |
|------------------------------------|---------------------------|-----------------------------|
| Gene name                          | Forward sequence (5'→3')  | Reverse sequence (5'→3')    |
| <i>Gapdh</i>                       | AGTGCCAGCCTCGTCTCATA      | AGAGAAGGCAGCCCTGGTAA        |
| <i>FoxO3</i>                       | CAGACCCTCAAACCTGACCGAA    | GCTGCTAACAGTCTCTGCTGG       |
| <i>Ascl1</i>                       | GGGATCCTACGACCCCCTTAG     | AGACACAGGATCTCCTGCCAT       |
| <i>Ngn2</i>                        | CGGGTAGGATGTTCGTCAAGT     | ACCCAGCAGCATCAGTACCT        |
| <i>Hes1</i>                        | GCGCCGGGCAAGAATAAA        | TTCCAGAATGTCTGCCTTCTCC      |
| <i>Hes6</i>                        | AGG CCA AGC TAG AGA ACG C | GGATGTAGCCAGCAGCGAA         |
| <i>Notch1</i>                      | GTGCGCTCTAGGTGCCAA        | TCT GAC ATG GGT TGG AGA TGC |
| <i>Reln</i>                        | AGTCCCTGGGGTTCTACCTC      | CATGCTCGAGGCAAGTTTCG        |
| <i>Lphn2</i>                       | TTTTCCCCTGCCAGAGAGAT      | CTGTGGAAGCCATGCAGAGA        |
| <b>Primers for ChIP-qPCR</b>       |                           |                             |
| Gene name                          | Forward sequence (5'→3')  | Reverse sequence (5'→3')    |
| <i>FoxO3</i>                       | AACCGGAAAAGCGTAGCTCA      | GGTATAGGGTTGTCGCGGAG        |
| <i>Ascl1</i>                       | TTTTCCAAGTTCTCAAGAGACTCC  | GGTTTTAAAAGAGGAAAGGGAAAA    |
| <b>Primers for MSRE-based qPCR</b> |                           |                             |
| Gene name                          | Forward sequence (5'→3')  | Reverse sequence (5'→3')    |
| <i>FoxO3</i>                       | GAGGTGTATTTTCGCGGGGA      | AGGTGATGAACGTGCTGGTC        |
| <i>Ascl1</i>                       | CAGGTTAACCAACTTGACCCG     | GAACTGATGCGCTGCAAACG        |

**Table S3. Antibody list**

| Antibody           | Dilution for WB | Manufacturer   | Cat. No. |
|--------------------|-----------------|----------------|----------|
| $\beta$ -actin     | 1:3000          | Cell signaling | 4970     |
| FOXO3              | 1:1000          | Cell signaling | 12829    |
| ASCL1              | 1:1000          | Abcam          | ab74065  |
| NOTCH1             | 1:1000          | Cell signaling | 3608     |
| LC3                | 1:1000          | Cell signaling | 4108     |
| P62                | 1:1000          | Abcam          | ab56416  |
| H3K9me2            | 1:1000          | Abcam          | ab1220   |
| H3K36me1           | 1:1000          | Cell signaling | 14111    |
| H3K18ac            | 1:1000          | Abcam          | ab1191   |
| H3K27ac            | 1:1000          | Abcam          | ab4729   |
| HistoneH3          | 1:1000          | Abcam          | ab1791   |
| DNMT1              | 1:1000          | Abcam          | ab13537  |
| DNMT3a             | 1:1000          | Abcam          | ab2850   |
| HRP-labeled rabbit | 1:5000          | Invitrogen     | 31460    |
| HRP-labeled mouse  | 1:5000          | Invitrogen     | 31430    |
